# Supplementary material for: High-resolution analysis of copy number alterations and associated expression changes in ovarian tumors
Source: PubMed Central journal article supplement (PMC2694826; doi:10.1186/1755-8794-2-21), 2009-05-06

### a. Breakpoints by Subtype

P-value:  $5.41e-01$

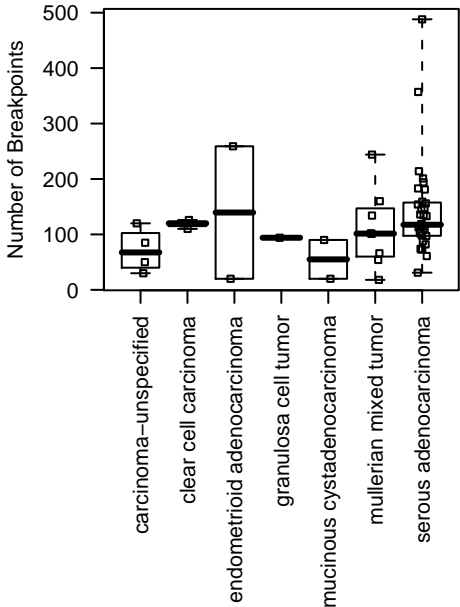

### b. Gains by Subtype

P-value:  $9.14e-01$

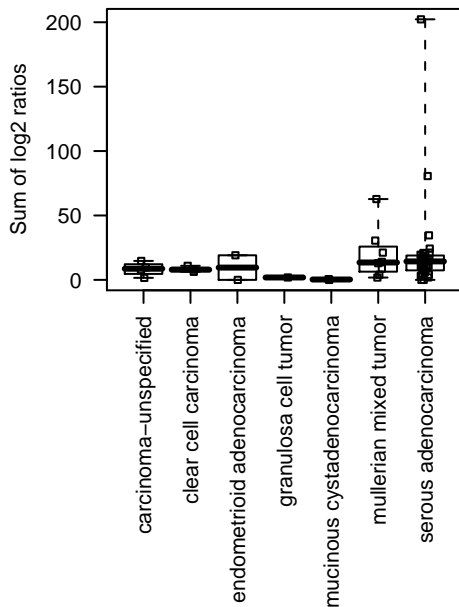

### c. Deletions by Subtype

P-value:  $1.06e-01$

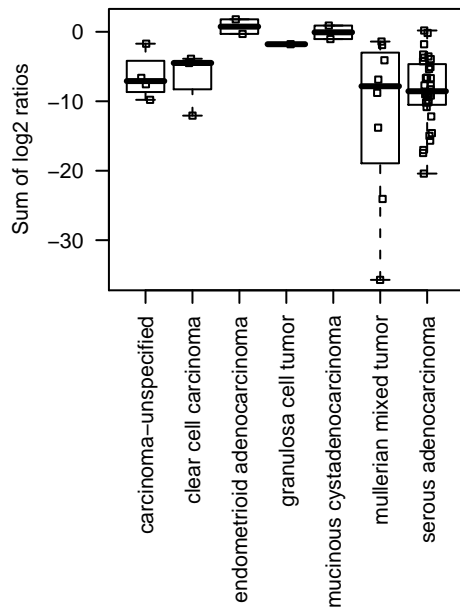

Supplement: 1755-8794-2-21-S3.pdf [file 1755-8794-2-21-S3.pdf]
