# Supplementary material for: High-resolution analysis of copy number alterations and associated expression changes in ovarian tumors
Source: PubMed Central journal article supplement (PMC2694826; doi:10.1186/1755-8794-2-21), 2009-05-06

### a. Copy Number Gains

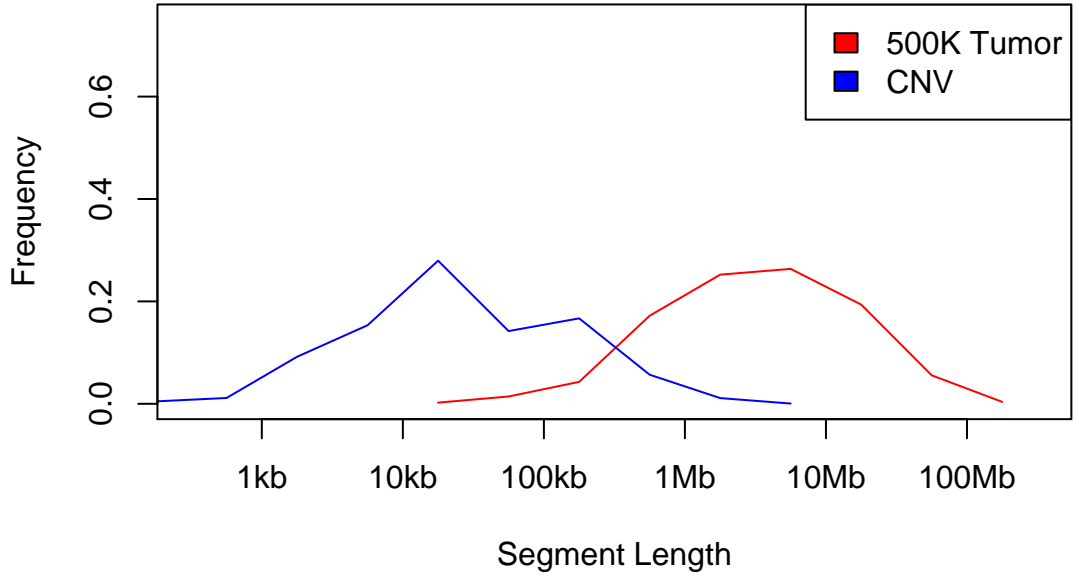

### b. Copy Number Losses

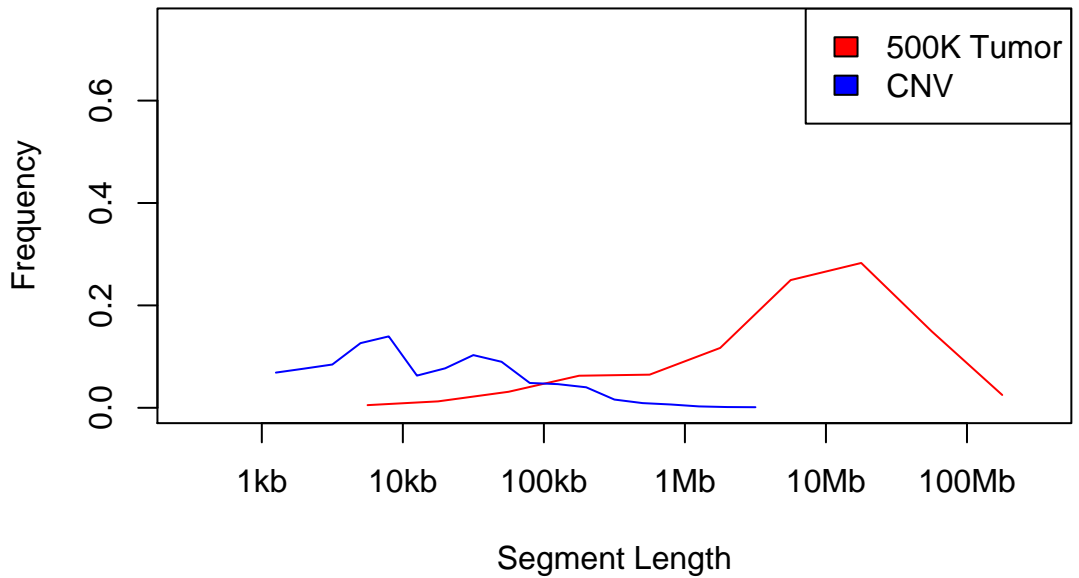

Supplement: 1755-8794-2-21-S5.pdf [file 1755-8794-2-21-S5.pdf]
